# Supplementary material for: Reversible breakage of the C–S bond: function of dl-methionine in PET-RDRP catalyzed by zinc protoporphyrin
Source: Royal Society of Chemistry journal article supplement (doi:10.1039/d3py01368e), 2024-01-01
Supplement: d3py01368e1.pdf [file d3py01368e1.pdf]

## Supporting Information

# Reversible Breakage of C-S Bond: Function of DL-Methionine in PET-RDRP Catalyzed by Zinc Protoporphyrin

Hanyu Lv <sup>a</sup>, Ziyu Wang <sup>a</sup>, Jiaqi An <sup>a</sup>, Ruiwen Hao <sup>b</sup>, Zongye Wang <sup>a</sup> and Yanwu Zhang <sup>\*a</sup>

*<sup>a</sup>School of Chemical Engineering, Zhengzhou University, 100# Science Road, Zhengzhou, 450001, P.R. China*

*<sup>b</sup>Jiangsu Yite New Materials Co., Ltd, Changzhou, 213000, China. E-mail: haoruiwen@jsyit  
e.cn*

\*Email: [zhangyanwu@zzu.edu.cn](mailto:zhangyanwu@zzu.edu.cn)

## 1. Experimental section.

### Materials

DL-Methionine (99%, J&K), protoporphyrin (PTP, 92%, Laboratory made), *N,N*-dimethylformamide (DMF, 99.9%, Sigma-Aldrich), zinc acetate dehydrate ( $\text{Zn}(\text{CH}_3\text{COO})_2 \cdot 2\text{H}_2\text{O}$ , 99%, Sigma-Aldrich), methanol (99.5%, Sigma-Aldrich), *N*-isopropyl acrylamide (NIPAm, 99%, J&K), acrylamide (AM, 99%, J&K), *N,N*-Dimethylacrylamide (DMA, 99%, Leyan), tert-Butyl acrylate (tBA, 99%, J&K), butyl acrylate (BA, 99%, Kermel), methyl methacrylate (MMA, 99%, Kermel), acrylic acid (AA, industrial-grade), sodium hydroxide (NaOH, 96%, Yong Da Chemical), dimethyl sulfoxide (DMSO, 99%, Sigma-Aldrich), ascorbic acid ( $\text{AH}_2$ , 99%, Kermel), sodium trifluoroacetate (NaTFA, 99%, aladdin), tetrahydrofuran (THF, 99%, aladdin), acetone (99%, aladdin) and dichloromethane (DCM, 99%, aladdin).

### Characterization

Fourier transform-infrared (FT-IR) spectra were recorded on an FT-IR Nicole spectrometer over the range of  $3480\text{-}485\text{ cm}^{-1}$ . UV-Vis absorption spectra were acquired on Shimadzu UV-2450 spectrometer. Fluorescence spectra were recorded on F-4500 Fluorescence spectrophotometer.  $^1\text{H}$  NMR spectroscopy was conducted on a Bruker AV 400 spectrometer with  $\text{Si}(\text{CH}_3)_4$  as an internal standard. Gel permeation chromatography (GPC) measurements were carried out by an Agilent 1100 series equipped with an RI-

G1362A RI detector and a PL gel Mixed-C column using DMF as the mobile phase at a flow rate of 1 mL min<sup>-1</sup> at 25 °C and carried out by an Agilent 1260 series equipped with an RI-G7162A RI detector and a PL aquagel-OH Mixed-M column using 0.05M Na<sub>2</sub>SO<sub>4</sub> aqueous solution as the mobile phase at a flow rate of 1 mL min<sup>-1</sup> at 30 °C. The EMX-9.5/12 X-band spectrometer was used to carry out the Electron Paramagnetic Resonance (EPR) experiments, under magnetic field modulation, at 100 kHz, and the tested power intensity was 20 mW. Matrix-assisted laser desorption/ionization time-of-flight (MALDI-TOF) mass spectrometry analysis was studied with a Bruker Reflex II time-of-flight mass spectrometer (Bruker-Franzen Analytik, Bremen, Germany).

## **2. The preparation of ZnPTP.**

PTP (28.00 mg) was dissolved in DMF (10.00 mL) and stirred at 140 °C under nitrogen atmosphere in 25.00 mL three-necked flask, and then the saturated methanol solution with Zn(CH<sub>3</sub>COO)<sub>2</sub>·2H<sub>2</sub>O (0.20 g, 0.92 mmol, 10.00 mL) was dropped into the reaction solution. Next, the reaction liquid was stirred for 2 h without light. After, the product was concentrated under reduced pressure and washed by deionized water (100 mL × 3). The black and red product (ZnPTP) was centrifuged and collected by vacuum drying. Yield: 83%.

## **3. PET-RDRP process of DMSO as solvent.**

For photo-catalyst-mediated RDRP process, a certain proportion of monomer, control agent, photocatalyst and DMSO were added into a 4 mL glass vial. The glass vial was sealed with a rubber septum without deoxygenation. The reaction mixture was then

irradiated under green LED light ( $\lambda_{\text{max}} = 577 \text{ nm}$ , 6 W, intensity =  $0.126 \text{ mW cm}^{-2}$ ) at 25 °C. After irradiation, aliquots of the reaction mixtures were withdrawn to measure monomer conversion rate and number-average molecular weights ( $M_n, {}^1\text{H NMR}$ ) by  ${}^1\text{H NMR}$  and polymer molecular weight distributions were measured by GPC. The reaction conditions for control studies where DL-Methionine is omitted entirely were the same as those for the process of PET-RDRP with added DL-Methionine.

#### **4. PET-RDRP process of H<sub>2</sub>O as solvent.**

To improve the solubility of ZnPTP in aqueous solution, a certain proportion of sodium hydroxide was added to deionized water. Photocatalyst and sodium hydroxide aqueous solution were added into a 4 mL glass vial. After ultrasonic dissolution, the mixture was mixed with hydrochloric acid solution until the pH was near neutral. Then a certain proportion of monomer and control agent were added into a 4 mL glass vial. Due to the poor stability of ascorbic acid over time under aqueous conditions, we only added ascorbic acid (AH<sub>2</sub>) as singlet oxygen quencher to the reaction mixture prior to the start of polymerization. The glass vial was sealed with a rubber septum without deoxygenation. The reaction mixture was then irradiated under green LED light ( $\lambda_{\text{max}} = 577 \text{ nm}$ , 6 W, intensity =  $0.126 \text{ mW cm}^{-2}$ ) at 25 °C. After irradiation, aliquots of the reaction mixtures were withdrawn to measure monomer conversion rate and number-average molecular weights ( $M_n, {}^1\text{H NMR}$ ) by  ${}^1\text{H NMR}$  and dispersity were measured by GPC. The reaction conditions for control studies where DL-Methionine is omitted entirely were the same as those for the process of PET-RDRP with added DL-Methionine.

## 5. EPR analysis of PET-RDRP polymerization.

200 equiv of NIPAm, 1 equiv of DL-Methionine and 0.16 equiv of ZnPTP and a certain amount of DMSO were added into a 4 mL glass vial. The glass vial was sealed with a rubber septum without deoxygenation. The reaction mixture was then added into a EPR sample tube, also without deoxygenation. Under green light irradiation ( $\lambda_{\max} = 577$  nm, 6 W) for certain time of the sample.

### Calculation equation for g-value.

$$g = \frac{h\nu}{\beta H}$$

Where  $h$  is the Planck constant ( $6.62607015 \times 10^{-34}$  J·s),  $\nu$  is the microwave frequency (9.823917 GHz),  $\beta$  is the Bohr magneton moment value ( $9.274 \times 10^{-21}$  erg/Gs, 1erg =  $10^{-7}$  J),  $H$  is the magnetic field intensity (3.5 KGs in Fig.3a).

## 6. MALDI-TOF MS analysis of PET-RDRP process.

The PNIPAm samples (4 mg mL<sup>-1</sup> in DCM), DCTB matrices (30 mg mL<sup>-1</sup> in acetone) and sodium trifluoroacetate solution (19 mg mL<sup>-1</sup> in THF) were all prepared for MALDI-TOF MS analysis. The above solutions were mixed in a ratio of 10:10:1 (PNIPAm:matrix:cationizing salt), and 0.5  $\mu$ L of the final solution was deposited onto the MALDI sample target and was allowed to dry at room temperature and ambient atmosphere.

PAA samples (1  $\mu$ g/ $\mu$ l in acetone and water) and sinapinic acid matrix (20  $\mu$ g/ $\mu$ l in acetone) were prepared for MALDI-TOF MS analysis. Mix the above 1  $\mu$ l sample solution and 1  $\mu$ l matrix solution, deposit 1  $\mu$ l of the final solution onto the MALDI

sample target, and dry at room temperature and ambient atmosphere.

## 7. Supplementary Figures

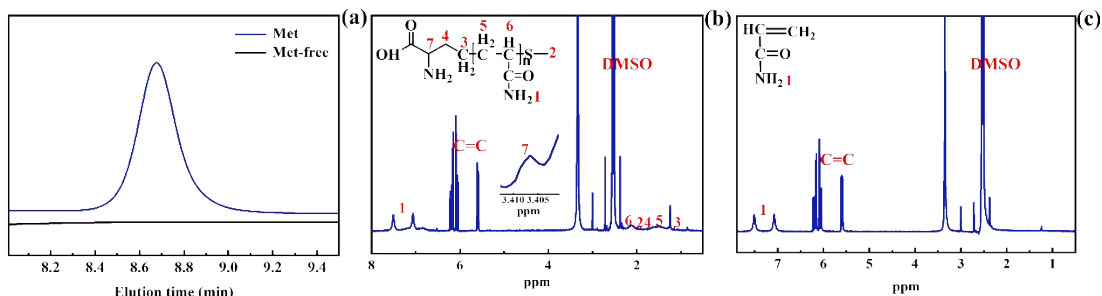

**Fig. S1.** PET-RDRP of AM mediated by ZnPTP in the presence (Met) or absence (Met-free) of DL-Methionine. (a) GPC curves of PAM;  $^1\text{H}$  NMR spectrum of PAM (b) in the presence and (c) in the absence of DL-Methionine.

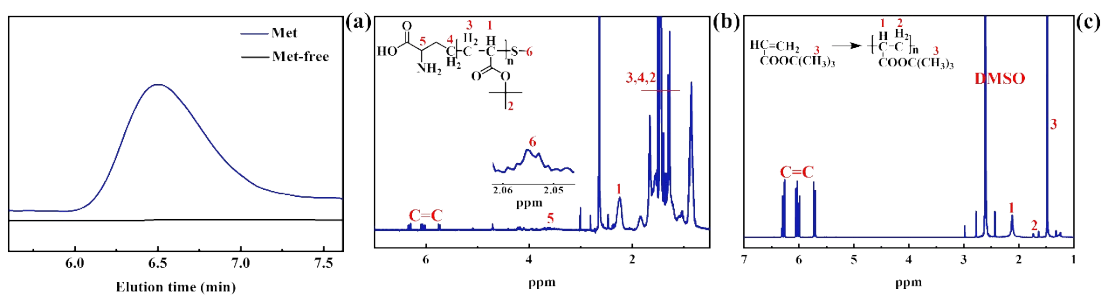

**Fig. S2.** PET-RDRP of tBA mediated by ZnPTP in the presence (Met) or absence (Met-free) of DL-Methionine. (a) GPC curves of PtBA;  $^1\text{H}$  NMR spectrum of PtBA (b) in the presence and (c) in the absence of DL-Methionine.

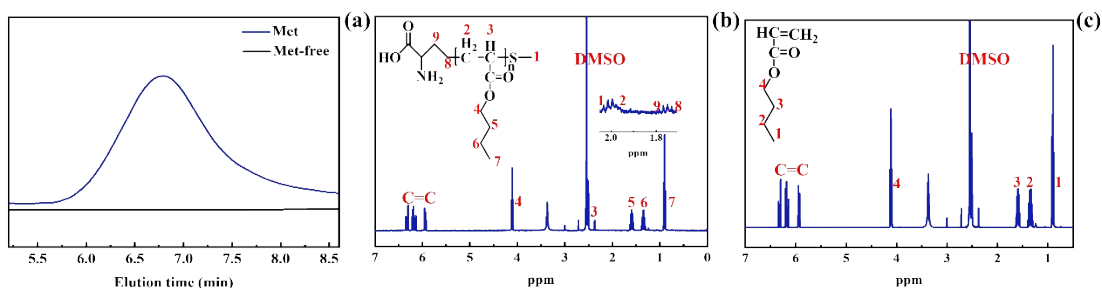

**Fig. S3.** PET-RDRP of BA mediated by ZnPTP in the presence (Met) or absence (Met-free) of DL-Methionine.

free) of DL-Methionine. (a) GPC curves of PBA;  $^1\text{H}$  NMR spectrum of PBA (b) in the presence and (c) in the absence of DL-Methionine.

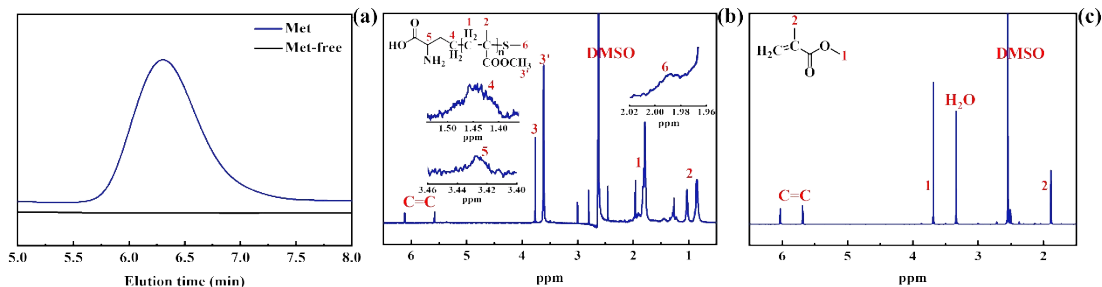

**Fig. S4.** PET-RDRP of MMA mediated by ZnPTP in the presence (Met) or absence (Met-free) of DL-Methionine. (a) GPC curves of PMMA;  $^1\text{H}$  NMR spectrum of PMMA (b) in the presence and (c) in the absence of DL-Methionine.

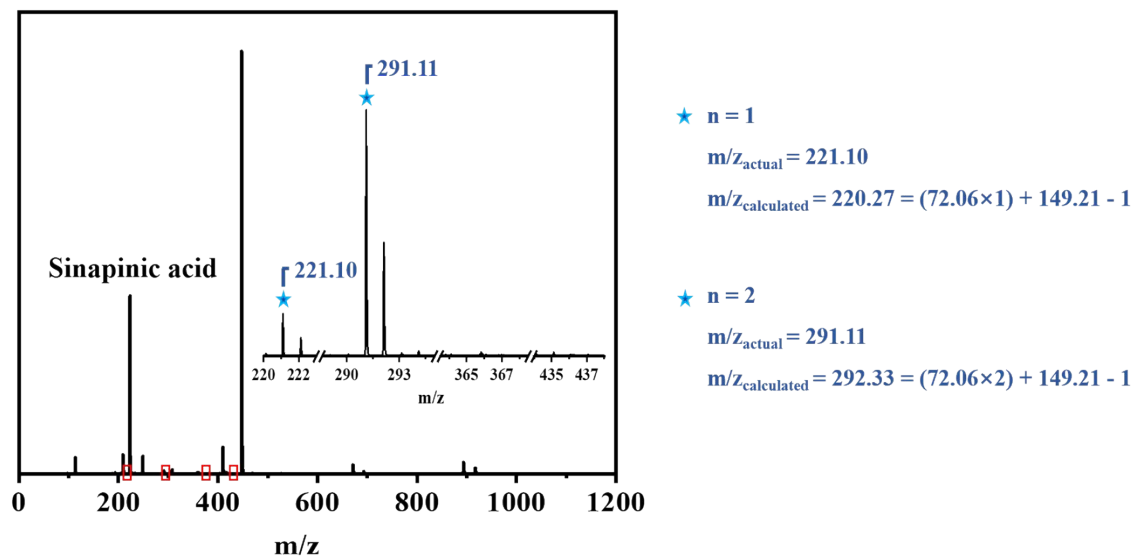

**Fig. S5.** MALDI-TOF MS of low-conversion PAA mediated by DL-Methionine.

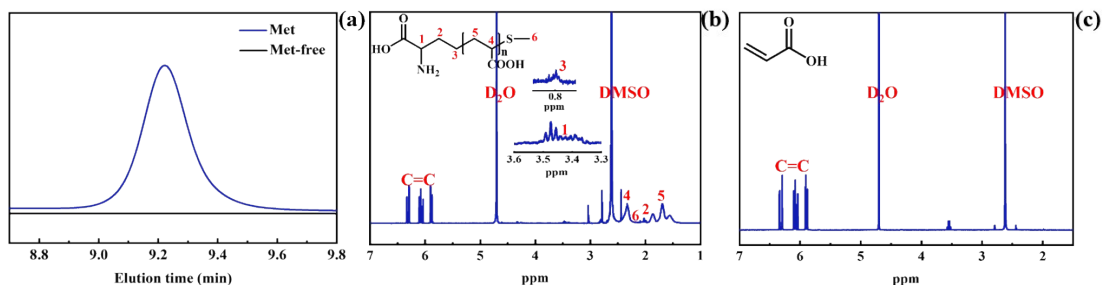

**Fig. S6.**  $^1\text{H}$  NMR spectrum of PAA (a) in the presence and (b) in the absence of DL-Methionine.

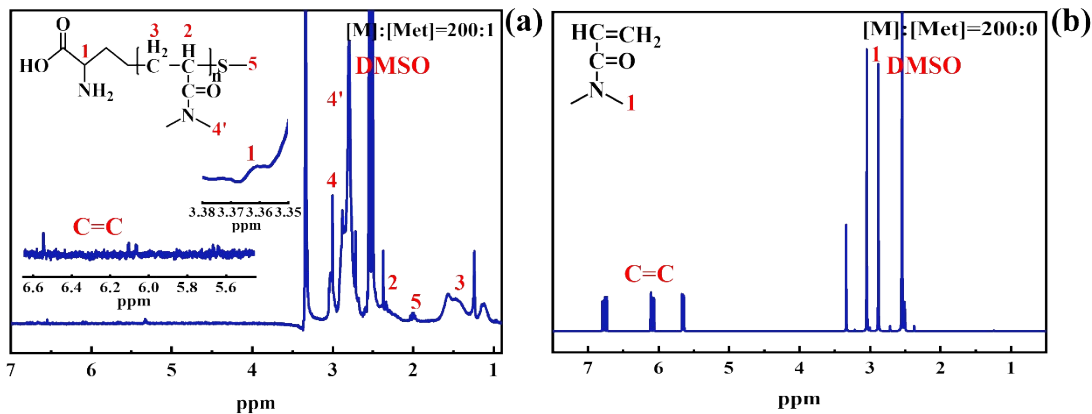

**Fig. S7.**  $^1\text{H}$  NMR spectrum of 200 ratios of PDMA (a) in the presence and (b) in the absence of DL-Methionine.

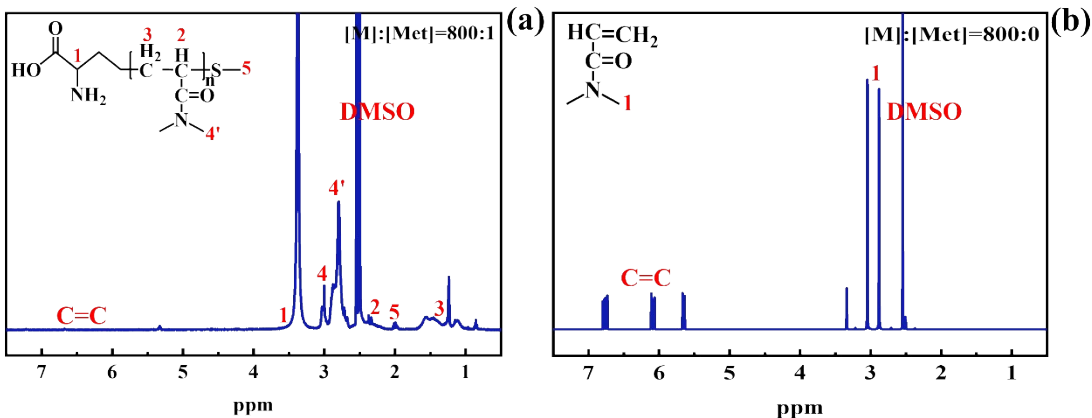

**Fig. S8.**  $^1\text{H}$  NMR spectrum of 800 ratios of PDMA (a) in the presence and (b) in the absence of DL-Methionine.



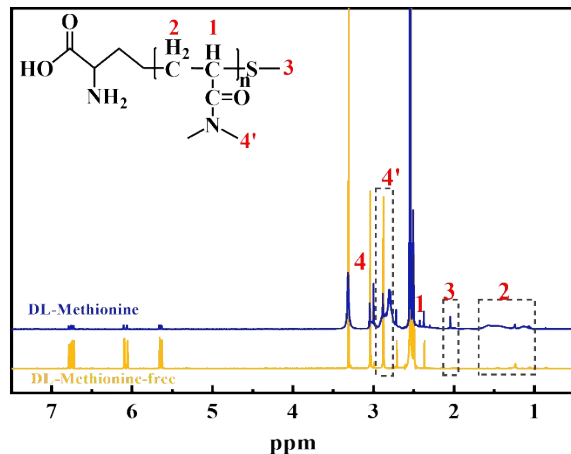

**Fig. S9.**  $^1\text{H}$  NMR spectrum of low molecular weight PDMA in the presence and in the absence of DL-Methionine.

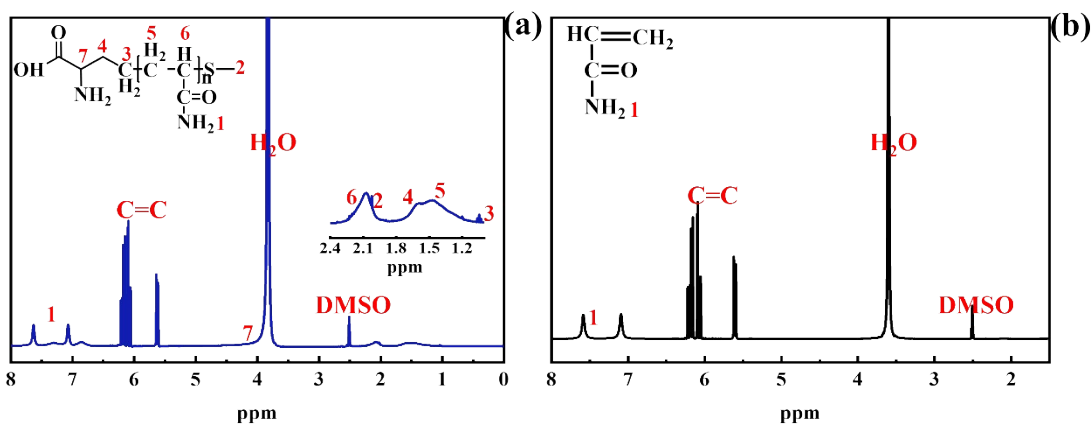

**Fig. S10.**  $^1\text{H}$  NMR spectrum of 800 ratios of PAM (a) in the presence and (b) in the absence of DL-Methionine.

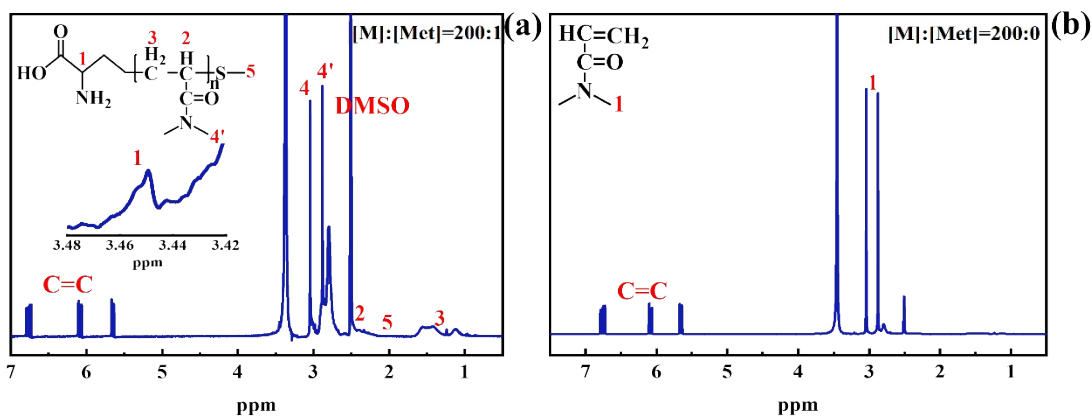

**Fig. S11.**  $^1\text{H}$  NMR spectrum of 200 ratios of PDMA (a) in the presence and (b) in the absence of DL-Methionine.

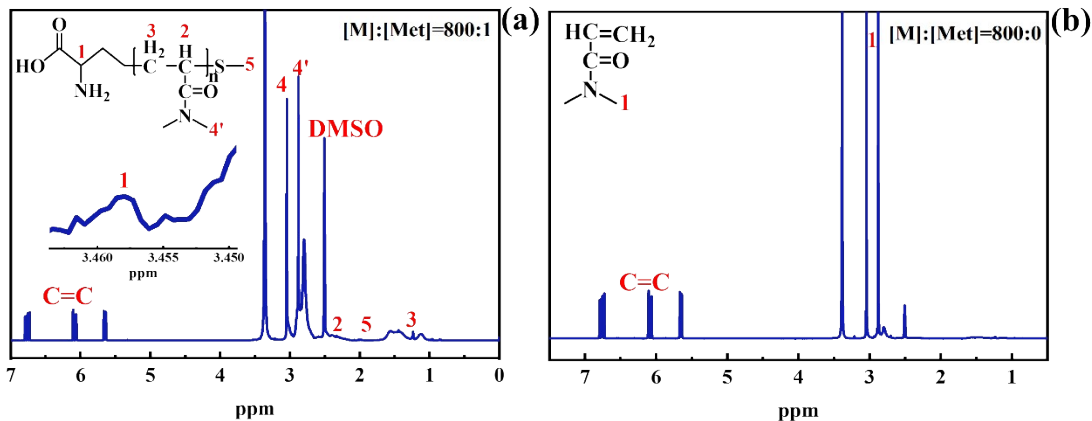

**Fig. S12.**  $^1\text{H}$  NMR spectrum of 800 ratios of PDMA (a) in the presence and (b) in the absence of DL-Methionine.

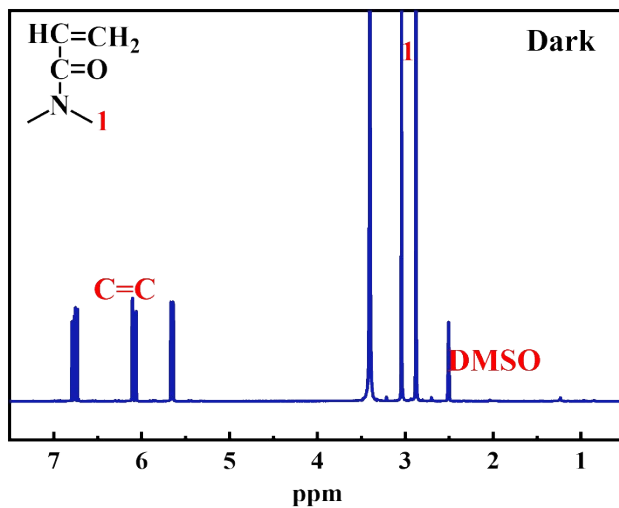

**Fig. S13.**  $^1\text{H}$  NMR spectrum of PDMA mediated by ZnPTP with a mole ratio of DMA:DL-Methionine = 200:1 under dark condition.
